# Supplementary material
Source: PubMed Central journal article supplement (PMC3323020)

## Supplemental Data

### Figure Legend

**Fig. S1.**  $\text{InsP}_6$  hydrolysis assay in the absence and presence of 10 mM  $\text{KH}_2\text{PO}_4$  (pH 5.0). The solid line represent a control injection of  $\text{InsP}_6$  in absence of enzyme, the dashed lines represents  $\text{InsP}_6$  hydrolysis by PhyAsr (wild type) in the absence of phosphate and the dotted lines represent  $\text{InsP}_6$  hydrolysis by PhyAsr (wild type) in the presence of 10 mM phosphate. The peak near 10 minutes is  $\text{Ins}(1,2,4,5,6)\text{P}_5$  and shows a clear reduction in hydrolysis in the presence of 10 mM phosphate after 2 minutes.

Figure S1

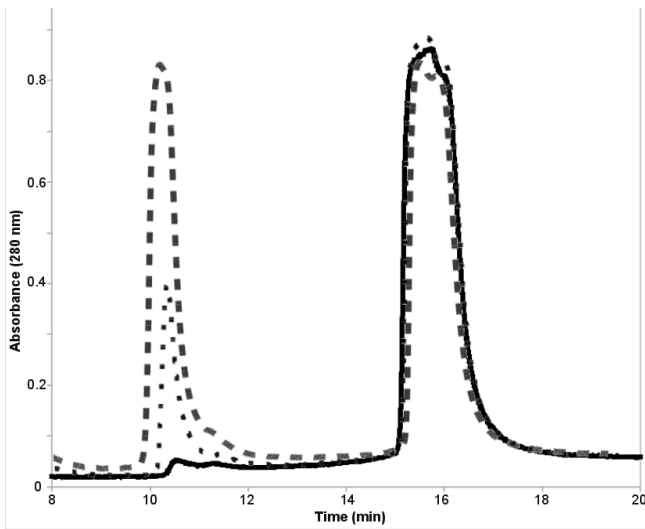

Supplement: supp_M111.309872_jbc.M111.309872-1.pdf [file supp_M111.309872_jbc.M111.309872-1.pdf]
